# Supplementary material for: Electrochemical investigations into ferrocenylphosphonic acid functionalized mesostructured porous nanocrystalline titanium oxide films
Source: Royal Society of Chemistry journal article supplement (doi:10.1039/b608607c), 2006-01-01
Supplement: b608607c.pdf [file b608607c.pdf]

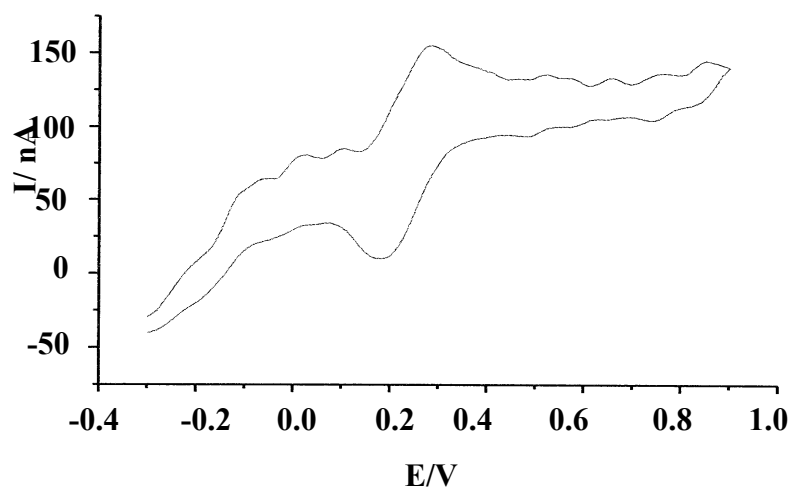

**Fig.a:** Cyclic voltammogram of  $\text{TiO}_2$  particles anchored with  $\text{FePO}_3\text{H}_2$ , electrolyte  $\text{KCl}$  1M, scan rate  $0.1 \text{ V s}^{-1}$ , reference SCE.
